# Supplementary material for: Application of deep learning to predict advanced neoplasia using big clinical data in colorectal cancer screening of asymptomatic adults
Source: PubMed Central journal article supplement — Korean J Intern Med. 2020 Oct 23;36(4):845–56. doi: 10.3904/kjim.2020.020 (PMC8273821; doi:10.3904/kjim.2020.020), 2020-10-23
Supplement: kjim-2020-020-suppl1.pdf [file kjim-2020-020-suppl1.pdf]

**Supplementary Table 1. Multiple logistic regression model fitted in the development group**

| Covariate                               | $\beta$ coefficient | Odds ratio | 95% CI     | <i>p</i> value |
|-----------------------------------------|---------------------|------------|------------|----------------|
| Age group, yr                           |                     |            |            | < 0.001        |
| < 50                                    | 1                   | 1          |            |                |
| $\geq 50, < 60$                         | 1.242               | 3.46       | 2.91–4.12  |                |
| $\geq 60, < 70$                         | 1.864               | 6.45       | 5.17–8.06  |                |
| $\geq 70$                               | 2.298               | 9.95       | 6.33–15.6  |                |
| Male sex                                | 0.451               | 1.57       | 1.32–1.87  | 0.001          |
| Current smoker                          | 0.279               | 1.32       | 1.14–1.54  | 0.001          |
| Family history of CRC                   | 0.050               | 1.05       | 0.76–1.46  | 0.765          |
| BMI ( $\geq 25$ kg/m <sup>2</sup> )     | 0.266               | 1.30       | 1.12–1.51  | 0.001          |
| Glucose ( $\geq 100$ mg/dL or diabetes) | 0.179               | 1.20       | 1.02–1.40  | 0.025          |
| LDL-C ( $\geq 100$ mg/dL)               | 0.177               | 1.19       | 0.99–1.45  | 0.069          |
| CEA group, ng/mL                        |                     |            |            | 0.001          |
| < 5                                     | 1                   | 1          |            |                |
| $\geq 5, < 10$                          | 0.867               | 2.38       | 1.59–3.56  |                |
| $\geq 10$                               | 2.174               | 8.79       | 3.47–22.31 |                |
| Constant                                | -5.405              | 0.00       | 0.00–0.01  | < 0.001        |

CI, confidence interval; CRC, colorectal cancer; BMI, body mass index; LDL-C, low-density lipoprotein cholesterol; CEA, carcinoembryonic antigen.
