# Supplementary material for: Application of deep learning to predict advanced neoplasia using big clinical data in colorectal cancer screening of asymptomatic adults
Source: PubMed Central journal article supplement — Korean J Intern Med. 2020 Oct 23;36(4):845–56. doi: 10.3904/kjim.2020.020 (PMC8273821; doi:10.3904/kjim.2020.020), 2020-10-23
Supplement: kjim-2020-020-suppl2.pdf [file kjim-2020-020-suppl2.pdf]

**Supplementary Table 2. Comparison of performances of deep neural network models with different values of hyperparameters**

| Model no.                               | Hidden layer, n | Node at layer #1, n | Node at layer #2, n | Node at layer #3, n | Node at layer #4, n | AUC in CV set 1 | AUC in CV set 2 | AUC in CV set 3 | AUC in CV set 4 | AUC in CV set 5 | Average AUC |
|-----------------------------------------|-----------------|---------------------|---------------------|---------------------|---------------------|-----------------|-----------------|-----------------|-----------------|-----------------|-------------|
| Deep neural network with nine variables |                 |                     |                     |                     |                     |                 |                 |                 |                 |                 |             |
| 1                                       | 2               | 26                  | 26                  | -                   | -                   | 0.753           | 0.730           | 0.733           | 0.718           | 0.731           | 0.7330      |
| 2                                       | 2               | 25                  | 20                  | -                   | -                   | 0.753           | 0.730           | 0.732           | 0.720           | 0.730           | 0.7330      |
| 3                                       | 2               | 25                  | 25                  | -                   | -                   | 0.753           | 0.729           | 0.733           | 0.720           | 0.730           | 0.7330      |
| 4                                       | 3               | 26                  | 26                  | 26                  | -                   | 0.750           | 0.732           | 0.734           | 0.718           | 0.728           | 0.7324      |
| 5                                       | 3               | 24                  | 24                  | 20                  | -                   | 0.752           | 0.732           | 0.734           | 0.720           | 0.724           | 0.7324      |
| 6                                       | 3               | 25                  | 25                  | 25                  | -                   | 0.752           | 0.732           | 0.733           | 0.720           | 0.724           | 0.7322      |
| 7                                       | 3               | 25                  | 20                  | 10                  | -                   | 0.752           | 0.733           | 0.733           | 0.720           | 0.723           | 0.7322      |
| 8                                       | 3               | 20                  | 10                  | 5                   | -                   | 0.751           | 0.729           | 0.734           | 0.720           | 0.727           | 0.7322      |
| 9                                       | 2               | 28                  | 28                  | -                   | -                   | 0.751           | 0.730           | 0.733           | 0.717           | 0.729           | 0.7320      |
| 10                                      | 3               | 20                  | 12                  | 3                   | -                   | 0.750           | 0.732           | 0.732           | 0.719           | 0.727           | 0.7320      |
| 11                                      | 2               | 30                  | 30                  | -                   | -                   | 0.751           | 0.730           | 0.731           | 0.718           | 0.729           | 0.7318      |
| 12                                      | 4               | 26                  | 26                  | 26                  | 26                  | 0.751           | 0.731           | 0.734           | 0.718           | 0.723           | 0.7314      |
| 13                                      | 2               | 18                  | 8                   | -                   | -                   | 0.751           | 0.729           | 0.731           | 0.715           | 0.731           | 0.7314      |
| 14                                      | 3               | 20                  | 15                  | 5                   | -                   | 0.750           | 0.730           | 0.731           | 0.720           | 0.725           | 0.7312      |
| 15                                      | 3               | 20                  | 11                  | 4                   | -                   | 0.751           | 0.730           | 0.731           | 0.720           | 0.722           | 0.7308      |
| 16                                      | 3               | 20                  | 13                  | 2                   | -                   | 0.752           | 0.729           | 0.723           | 0.720           | 0.730           | 0.7308      |
| 17                                      | 3               | 30                  | 20                  | 10                  | -                   | 0.750           | 0.732           | 0.732           | 0.719           | 0.720           | 0.7306      |
| 18                                      | 2               | 16                  | 8                   | -                   | -                   | 0.750           | 0.729           | 0.726           | 0.717           | 0.730           | 0.7304      |
| 19                                      | 2               | 10                  | 2                   | -                   | -                   | 0.752           | 0.728           | 0.724           | 0.715           | 0.732           | 0.7302      |
| 20                                      | 2               | 12                  | 4                   | -                   | -                   | 0.750           | 0.728           | 0.726           | 0.716           | 0.731           | 0.7302      |
| 21                                      | 4               | 25                  | 25                  | 25                  | 25                  | 0.748           | 0.730           | 0.734           | 0.718           | 0.720           | 0.7300      |
| 22                                      | 2               | 14                  | 6                   | -                   | -                   | 0.751           | 0.729           | 0.727           | 0.715           | 0.725           | 0.7294      |
| 23                                      | 2               | 20                  | 10                  | -                   | -                   | 0.737           | 0.734           | 0.714           | 0.725           | 0.722           | 0.7264      |
| Deep neural network with 26 variables   |                 |                     |                     |                     |                     |                 |                 |                 |                 |                 |             |
| 1                                       | 2               | 10                  | 10                  | -                   | -                   | 0.742           | 0.740           | 0.719           | 0.730           | 0.727           | 0.7316      |
| 2                                       | 3               | 20                  | 20                  | 20                  | -                   | 0.745           | 0.737           | 0.718           | 0.723           | 0.722           | 0.729       |
| 3                                       | 2               | 15                  | 15                  | -                   | -                   | 0.746           | 0.738           | 0.720           | 0.724           | 0.716           | 0.7288      |
| 4                                       | 2               | 20                  | 20                  | -                   | -                   | 0.745           | 0.738           | 0.723           | 0.725           | 0.713           | 0.7288      |
| 5                                       | 2               | 25                  | 25                  | -                   | -                   | 0.745           | 0.739           | 0.718           | 0.722           | 0.720           | 0.7288      |
| 6                                       | 3               | 25                  | 25                  | 25                  | -                   | 0.749           | 0.733           | 0.718           | 0.726           | 0.716           | 0.7284      |
| 7                                       | 3               | 22                  | 22                  | 22                  | -                   | 0.743           | 0.736           | 0.722           | 0.722           | 0.719           | 0.7284      |
| 8                                       | 3               | 35                  | 35                  | 35                  | -                   | 0.748           | 0.736           | 0.718           | 0.722           | 0.715           | 0.7278      |
| 9                                       | 4               | 50                  | 40                  | 30                  | 10                  | 0.740           | 0.734           | 0.718           | 0.721           | 0.722           | 0.7270      |
| 10                                      | 2               | 40                  | 40                  | -                   | -                   | 0.742           | 0.739           | 0.723           | 0.723           | 0.708           | 0.7270      |
| 11                                      | 3               | 45                  | 45                  | 45                  | -                   | 0.745           | 0.733           | 0.720           | 0.721           | 0.715           | 0.7268      |
| 12                                      | 4               | 30                  | 30                  | 30                  | 30                  | 0.738           | 0.734           | 0.714           | 0.725           | 0.722           | 0.7266      |
| 13                                      | 4               | 30                  | 30                  | 30                  | 30                  | 0.738           | 0.734           | 0.714           | 0.725           | 0.722           | 0.7266      |
| 14                                      | 3               | 55                  | 55                  | 55                  | -                   | 0.741           | 0.736           | 0.718           | 0.720           | 0.717           | 0.7264      |
| 15                                      | 4               | 25                  | 25                  | 25                  | 25                  | 0.739           | 0.733           | 0.715           | 0.725           | 0.720           | 0.7264      |

**Supplementary Table 2. Continued**

| Model no. | Hidden layer, n | Node at layer #1, n | Node at layer #2, n | Node at layer #3, n | Node at layer #4, n | AUC in CV set 1 | AUC in CV set 2 | AUC in CV set 3 | AUC in CV set 4 | AUC in CV set 5 | Average AUC |
|-----------|-----------------|---------------------|---------------------|---------------------|---------------------|-----------------|-----------------|-----------------|-----------------|-----------------|-------------|
| 16        | 3               | 10                  | 10                  | 10                  | -                   | 0.739           | 0.742           | 0.713           | 0.717           | 0.720           | 0.7262      |
| 17        | 4               | 20                  | 20                  | 20                  | 20                  | 0.739           | 0.735           | 0.716           | 0.723           | 0.718           | 0.7262      |
| 18        | 3               | 65                  | 65                  | 65                  | -                   | 0.741           | 0.736           | 0.716           | 0.720           | 0.717           | 0.7260      |
| 19        | 4               | 40                  | 40                  | 40                  | 40                  | 0.736           | 0.734           | 0.714           | 0.728           | 0.717           | 0.7258      |
| 20        | 4               | 45                  | 45                  | 45                  | 45                  | 0.74            | 0.732           | 0.716           | 0.719           | 0.719           | 0.7252      |
| 21        | 4               | 35                  | 35                  | 35                  | 35                  | 0.739           | 0.732           | 0.716           | 0.722           | 0.716           | 0.7250      |
| 22        | 4               | 60                  | 40                  | 20                  | 5                   | 0.739           | 0.731           | 0.714           | 0.720           | 0.719           | 0.7246      |
| 23        | 4               | 40                  | 30                  | 20                  | 10                  | 0.740           | 0.731           | 0.714           | 0.722           | 0.715           | 0.7244      |

All deep neural networks presented in the table used the sigmoid functions, the Xavier initializer, and the Adam optimizer with 1,000 epochs of the same dataset of the development group for each model.

AUC, area under the receiver operating characteristic curve; CV, cross-validation.
