# Supplementary material for: Application of deep learning to predict advanced neoplasia using big clinical data in colorectal cancer screening of asymptomatic adults
Source: PubMed Central journal article supplement — Korean J Intern Med. 2020 Oct 23;36(4):845–56. doi: 10.3904/kjim.2020.020 (PMC8273821; doi:10.3904/kjim.2020.020), 2020-10-23
Supplement: kjim-2020-020-suppl3.pdf [file kjim-2020-020-suppl3.pdf]

**Supplementary Table 3. Performance of conventional machine learning methods as well as DNN model compared with LR with 26 variables in the prediction of advanced neoplasia**

| Prediction model     | AUC (95% CI)        | <i>p</i> value |
|----------------------|---------------------|----------------|
| LR with 26 variables | 0.734 (0.695–0.773) | Reference      |
| SVM                  | 0.603 (0.556–0.649) | < 0.001        |
| RF                   | 0.672 (0.632–0.712) | 0.001          |
| XGBoost              | 0.760 (0.725–0.795) | 0.064          |
| DNN                  | 0.760 (0.724–0.795) | 0.036          |

DNN, deep neural network; LR, logistic regression; AUC, area under the receiver operating characteristic curve; CI, confidence interval; SVM, support vector machine; RF, random forest; XGBoost, extreme gradient boosting.
